# Supplementary material for: New Benzo[c]phenanthridine and Benzenoid Derivatives, and Other Constituents from Zanthoxylum ailanthoides: Effects on Neutrophil Pro-Inflammatory Responses
Source: Int J Mol Sci. 2013 Nov 13;14(11):22395–408. doi: 10.3390/ijms141122395 (PMC3856070; doi:10.3390/ijms141122395)

## Supplementary Information

**Figure S1.** ESI-MS spectrum of **1**.

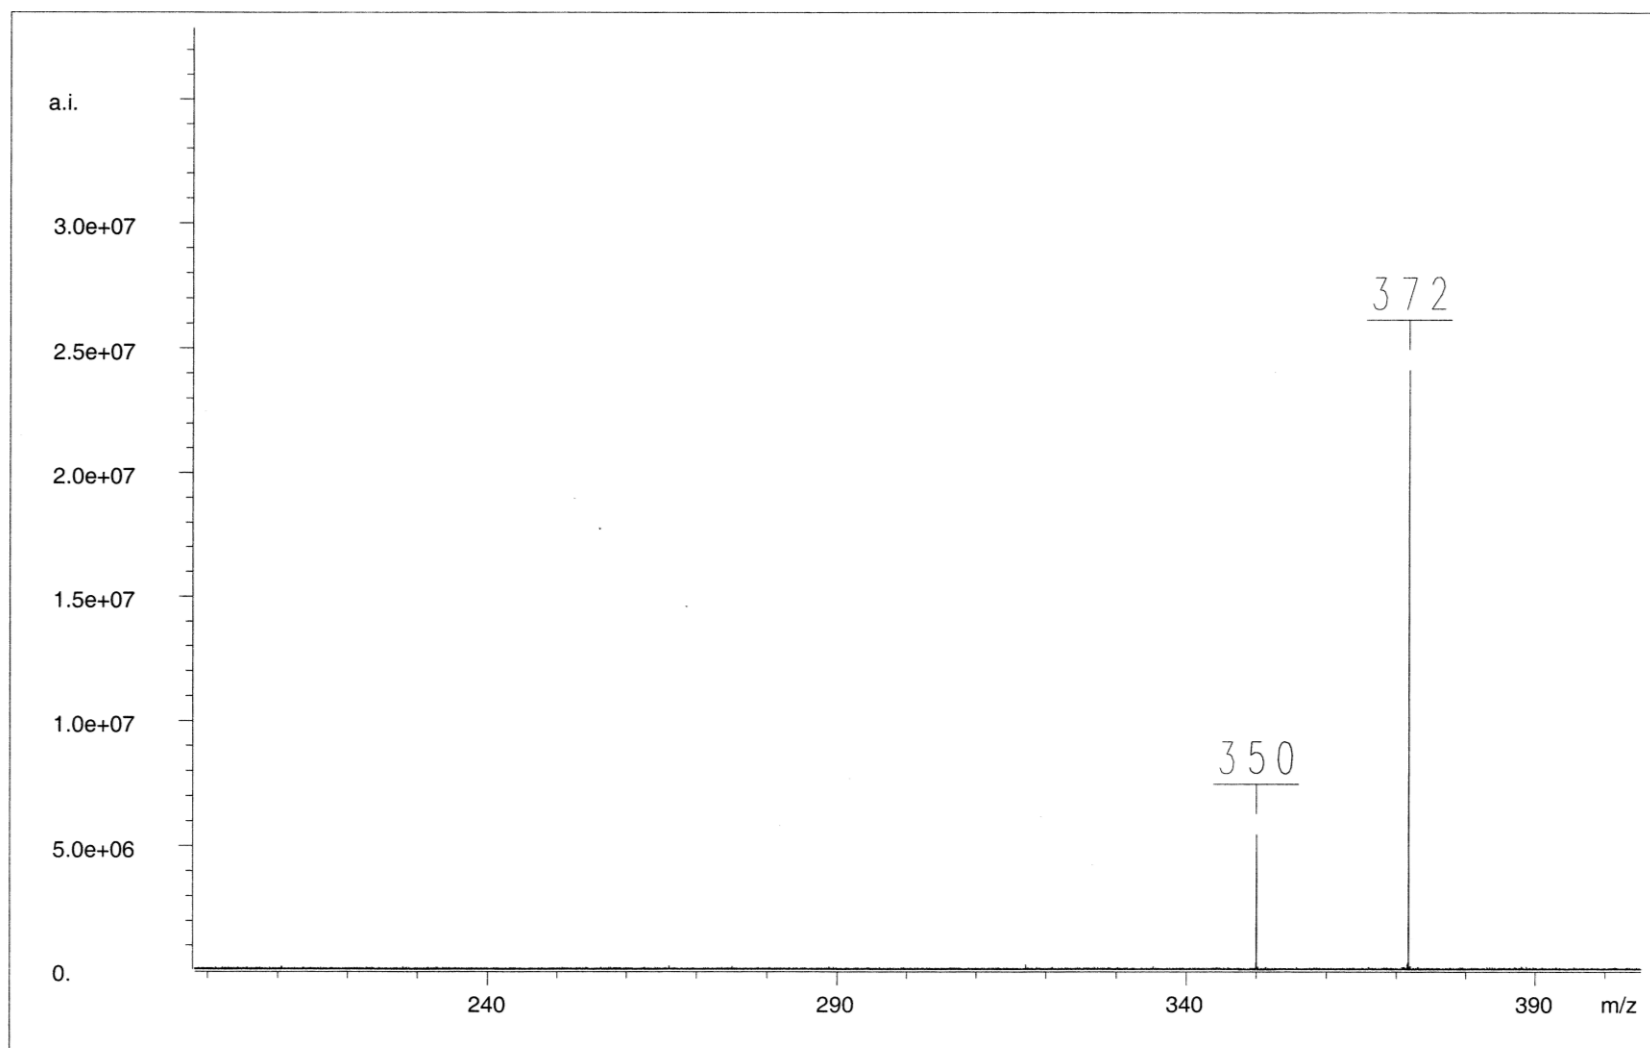

**Figure S2.** HR-ESI-MS spectrum of **1**.

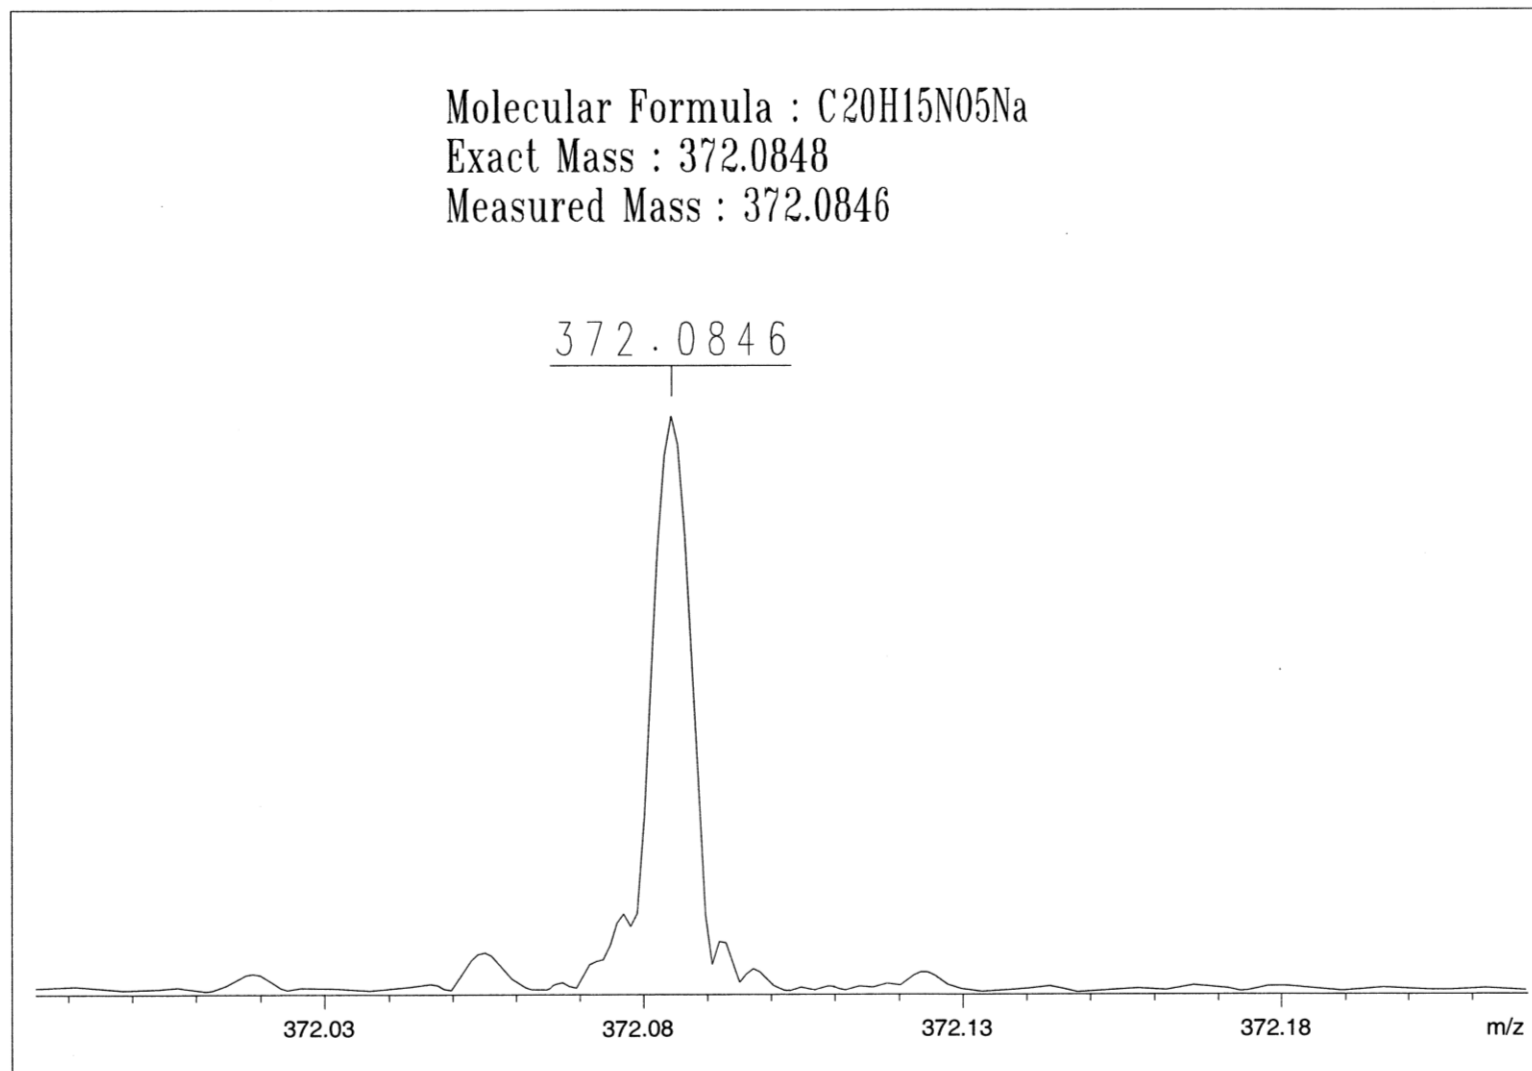

**Figure S3.**  $^1\text{H}$ -NMR spectrum ( $\text{CDCl}_3$ , 400 MHz) of **1**.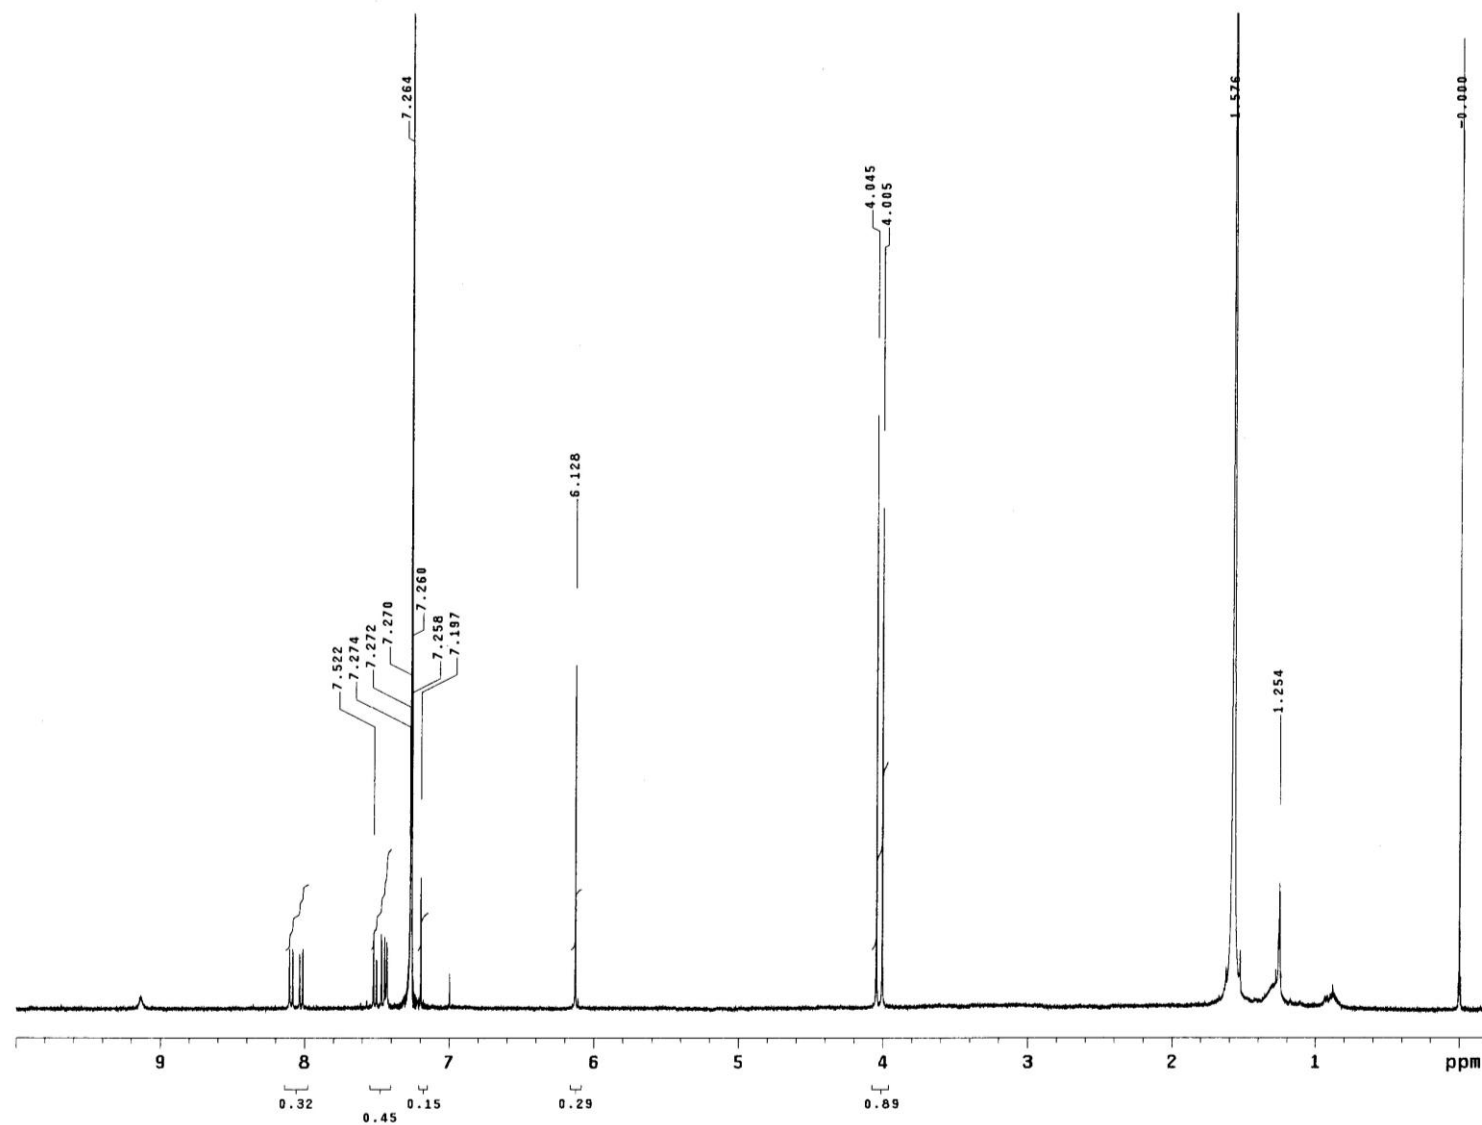

**Figure S4.**  $^{13}\text{C}$ -NMR spectrum ( $\text{CDCl}_3$ , 100 MHz) of **1**.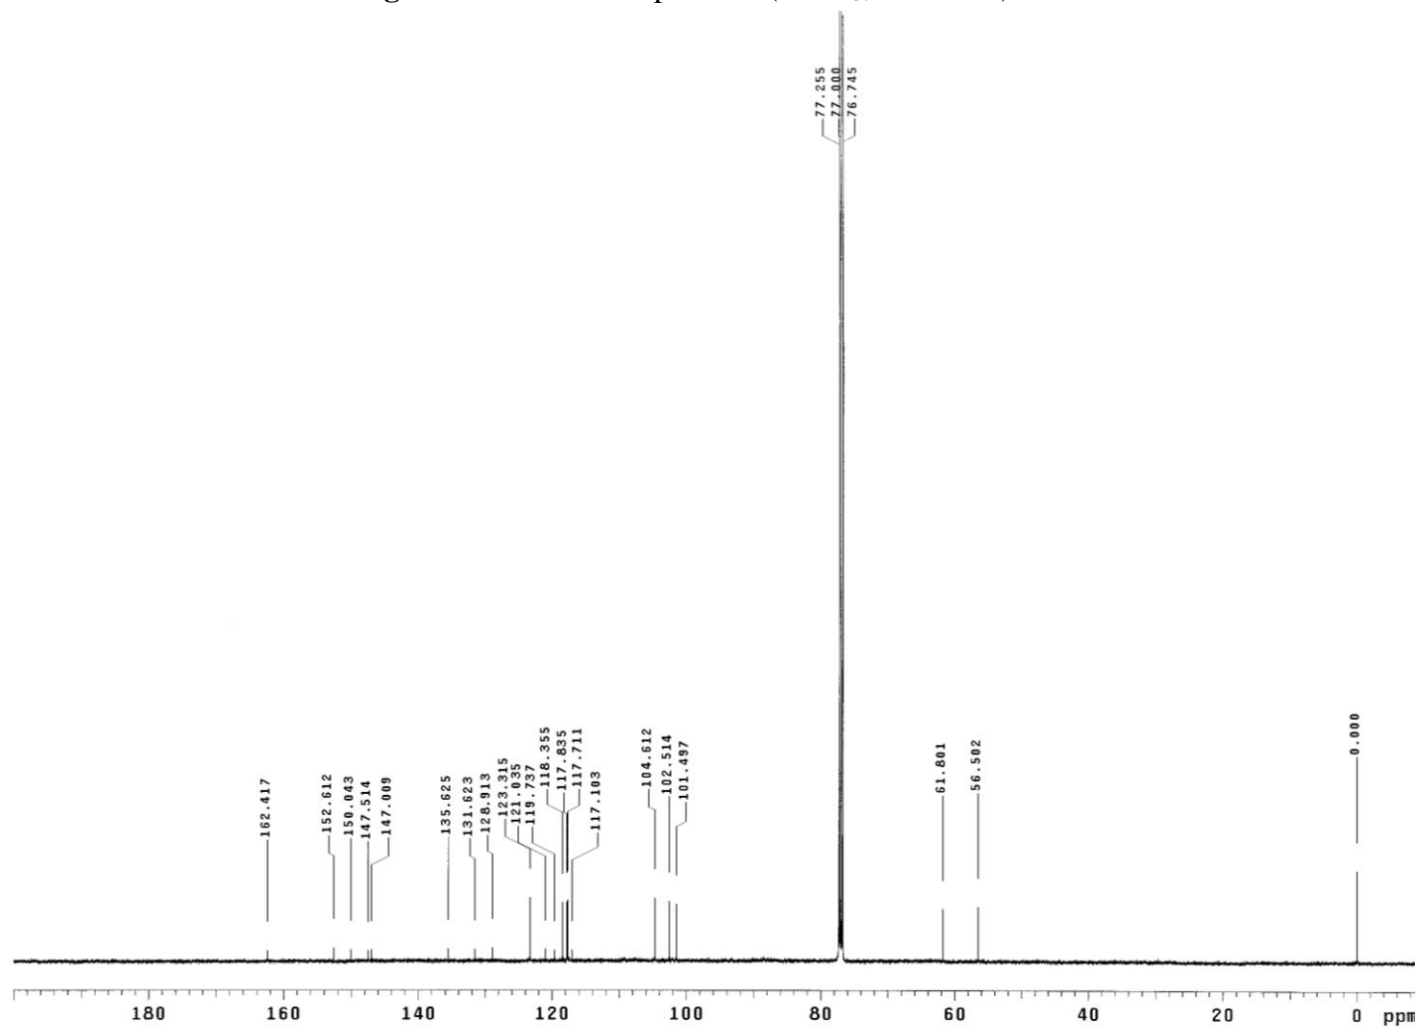

**Figure S5.** ESI-MS spectrum of **2**.

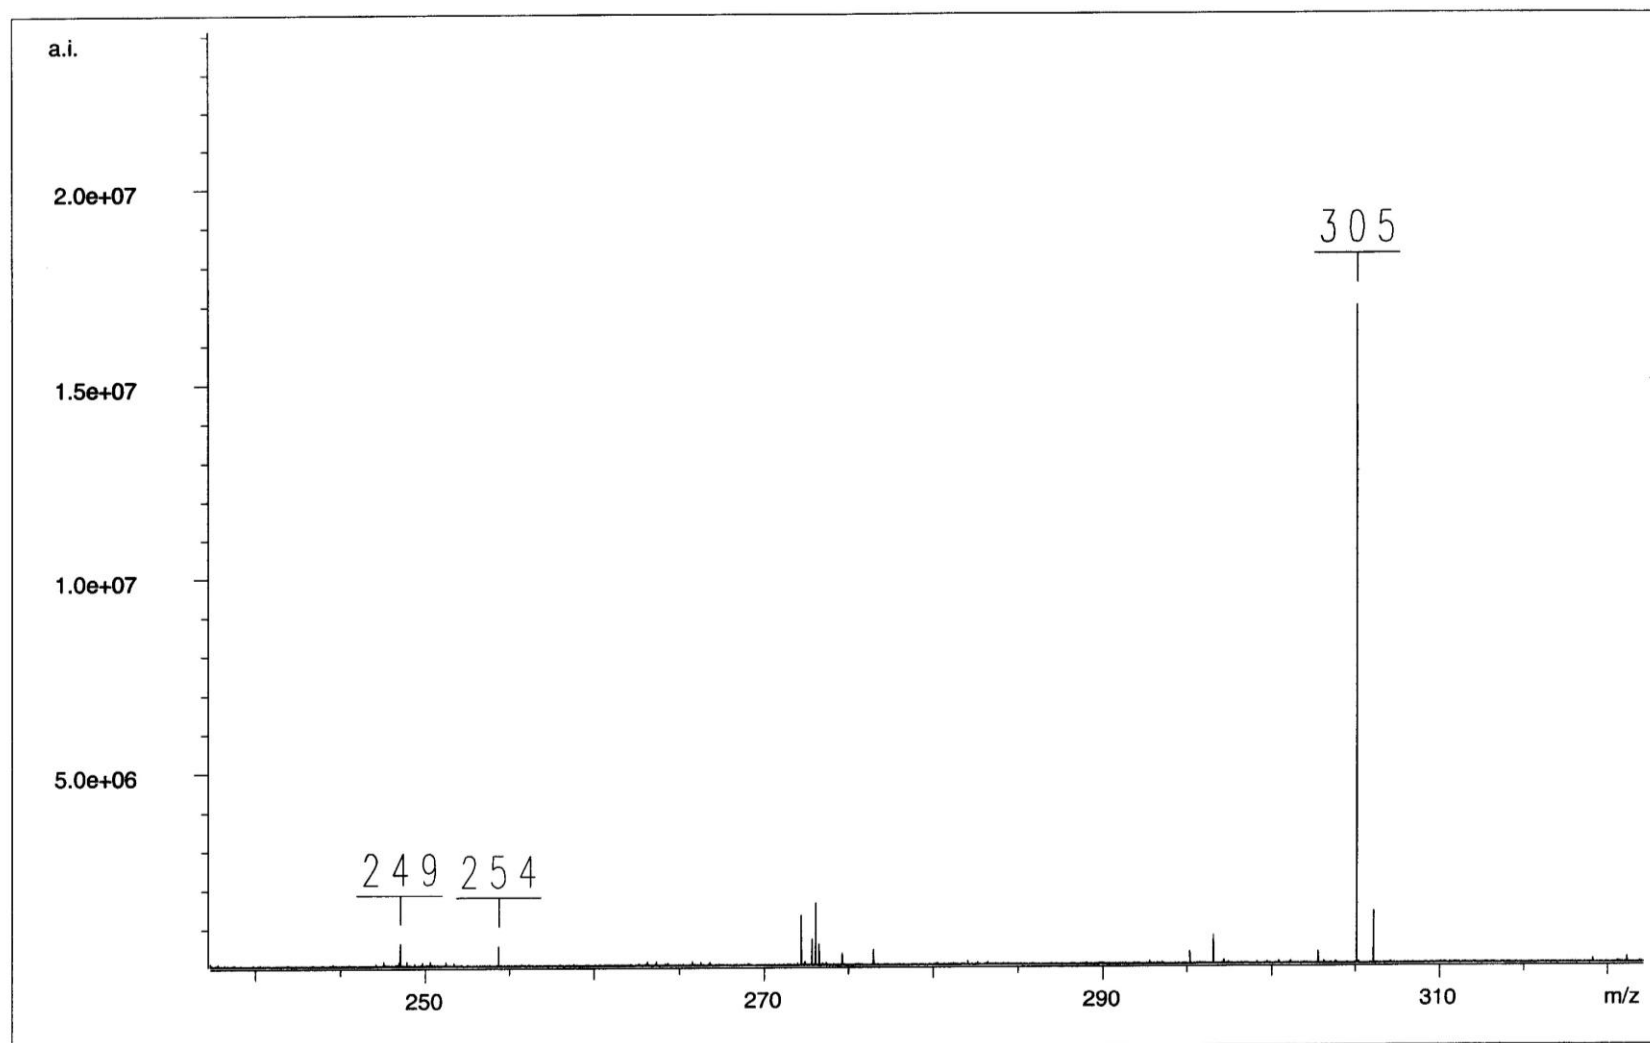

**Figure S6.** HR-ESI-MS spectrum of **2**.

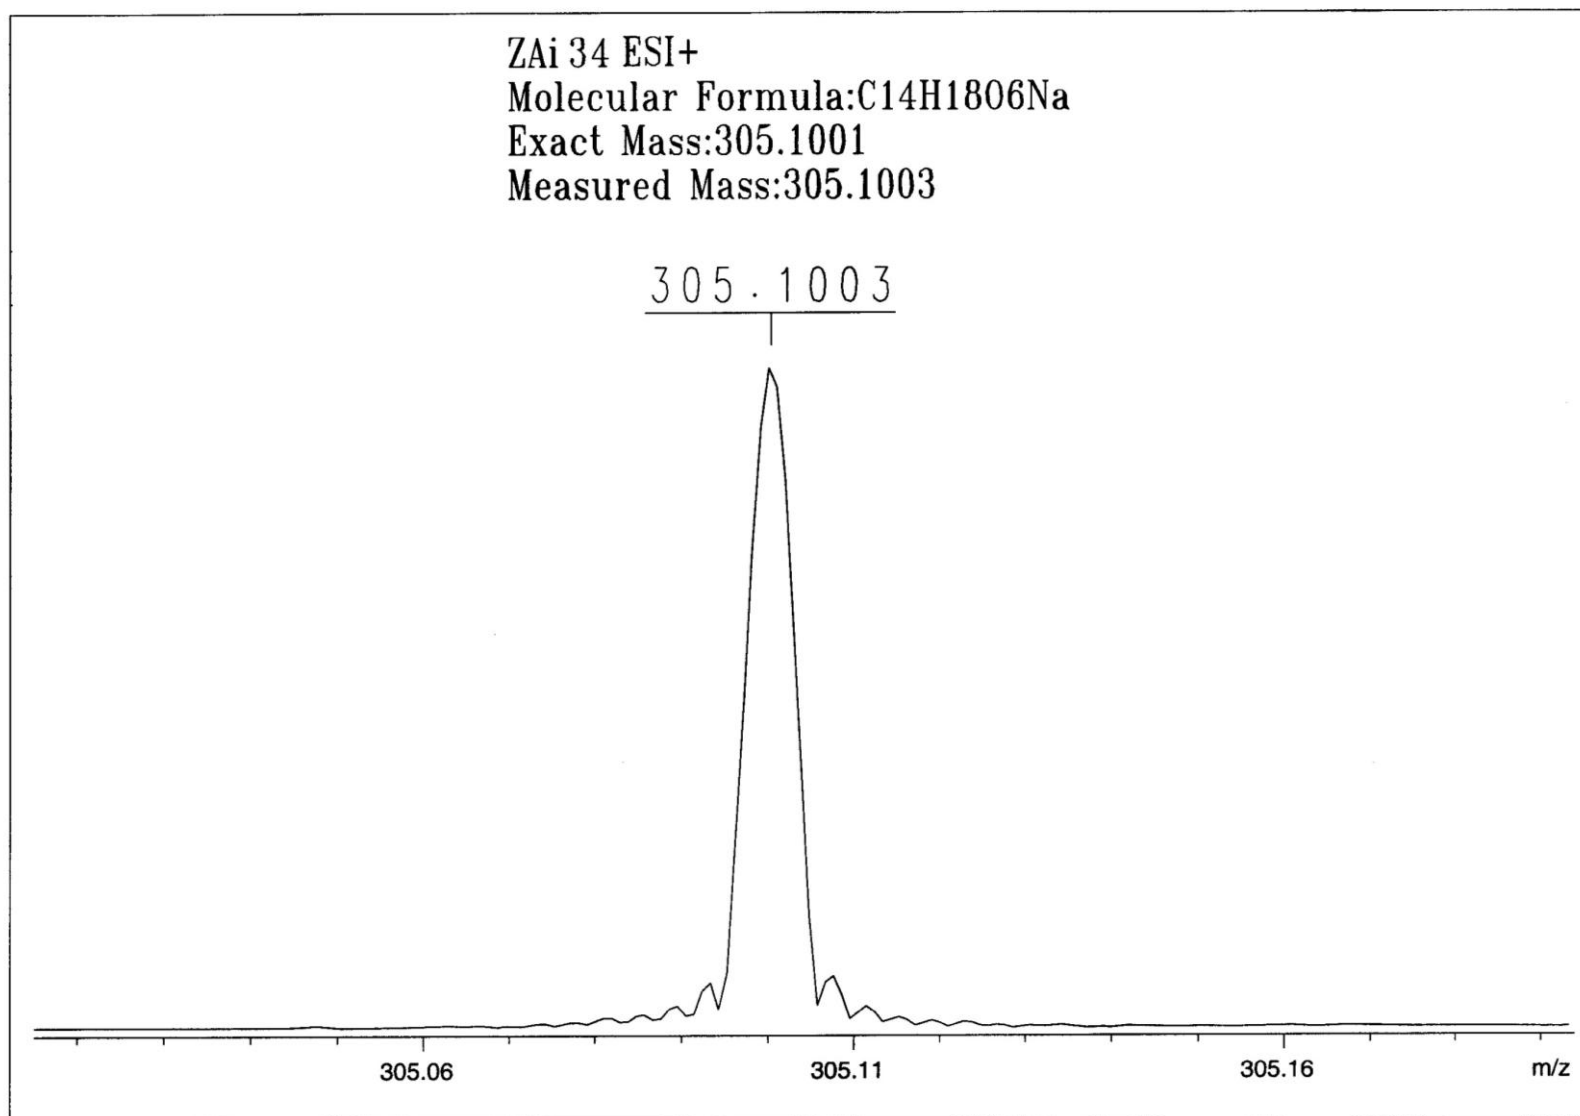

**Figure S7.**  $^1\text{H}$ -NMR spectrum ( $\text{CDCl}_3$ , 500 MHz) of **2**.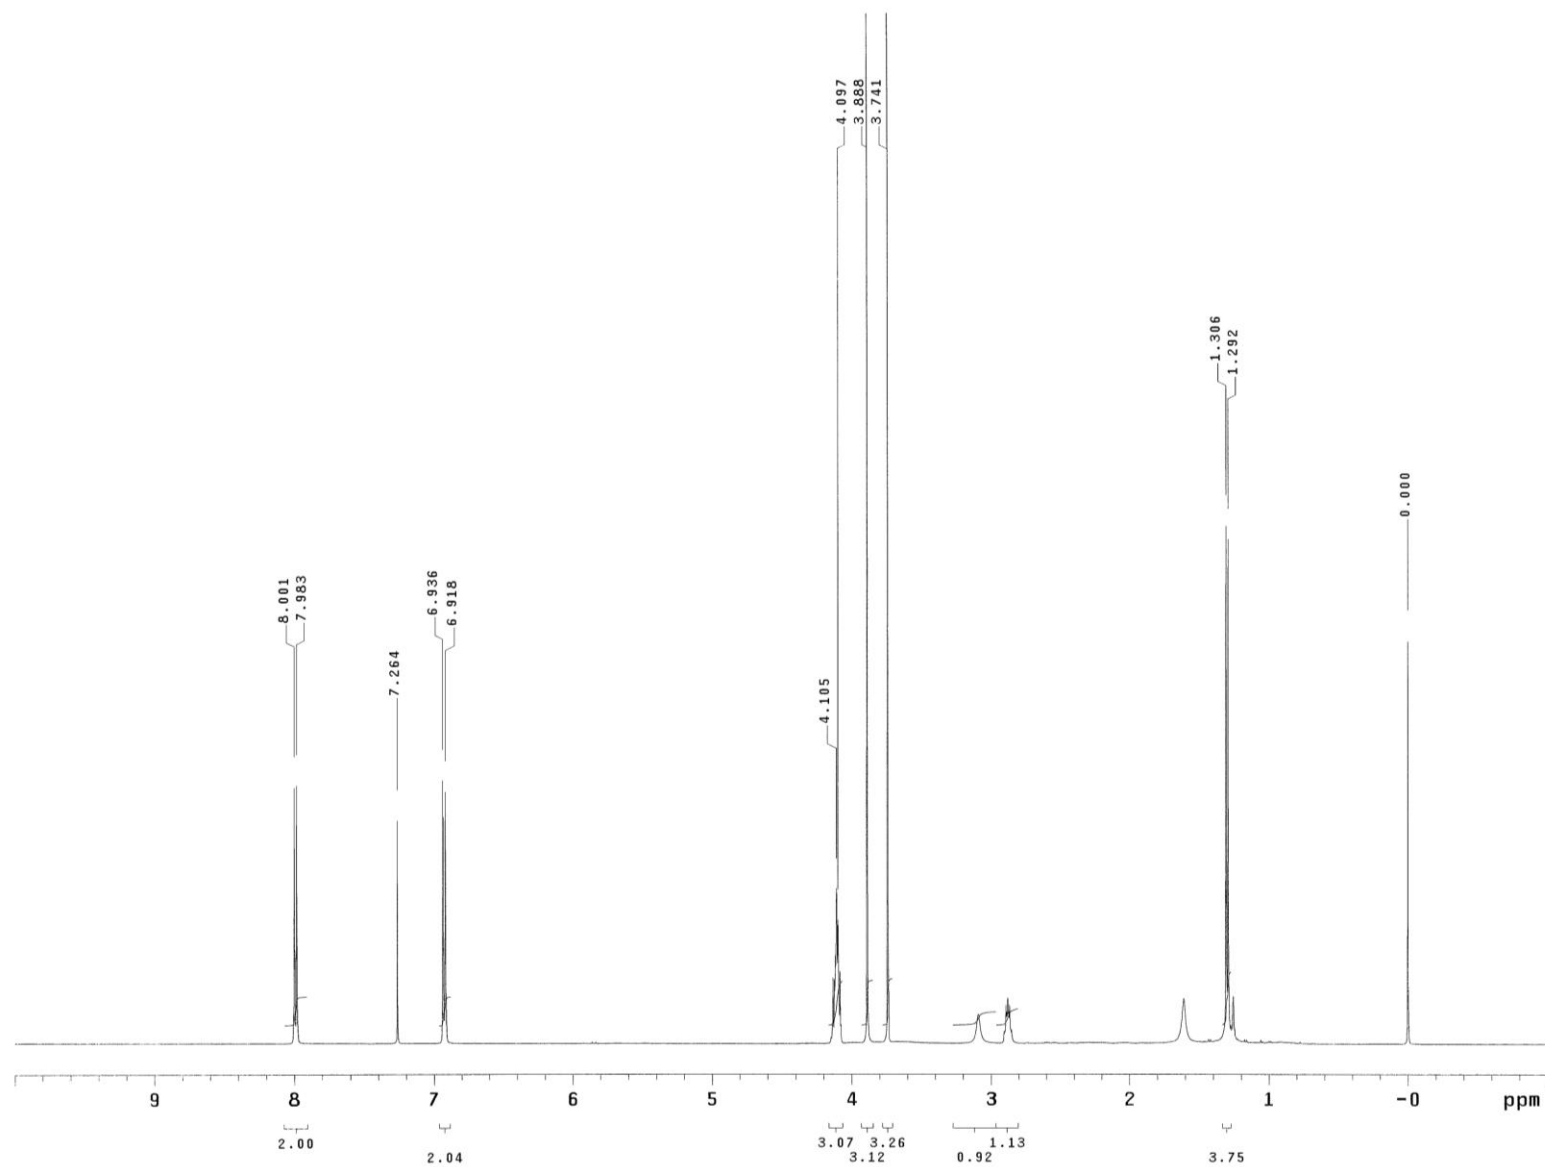

**Figure S8.**  $^{13}\text{C}$ -NMR spectrum ( $\text{CDCl}_3$ , 125 MHz) of **2**.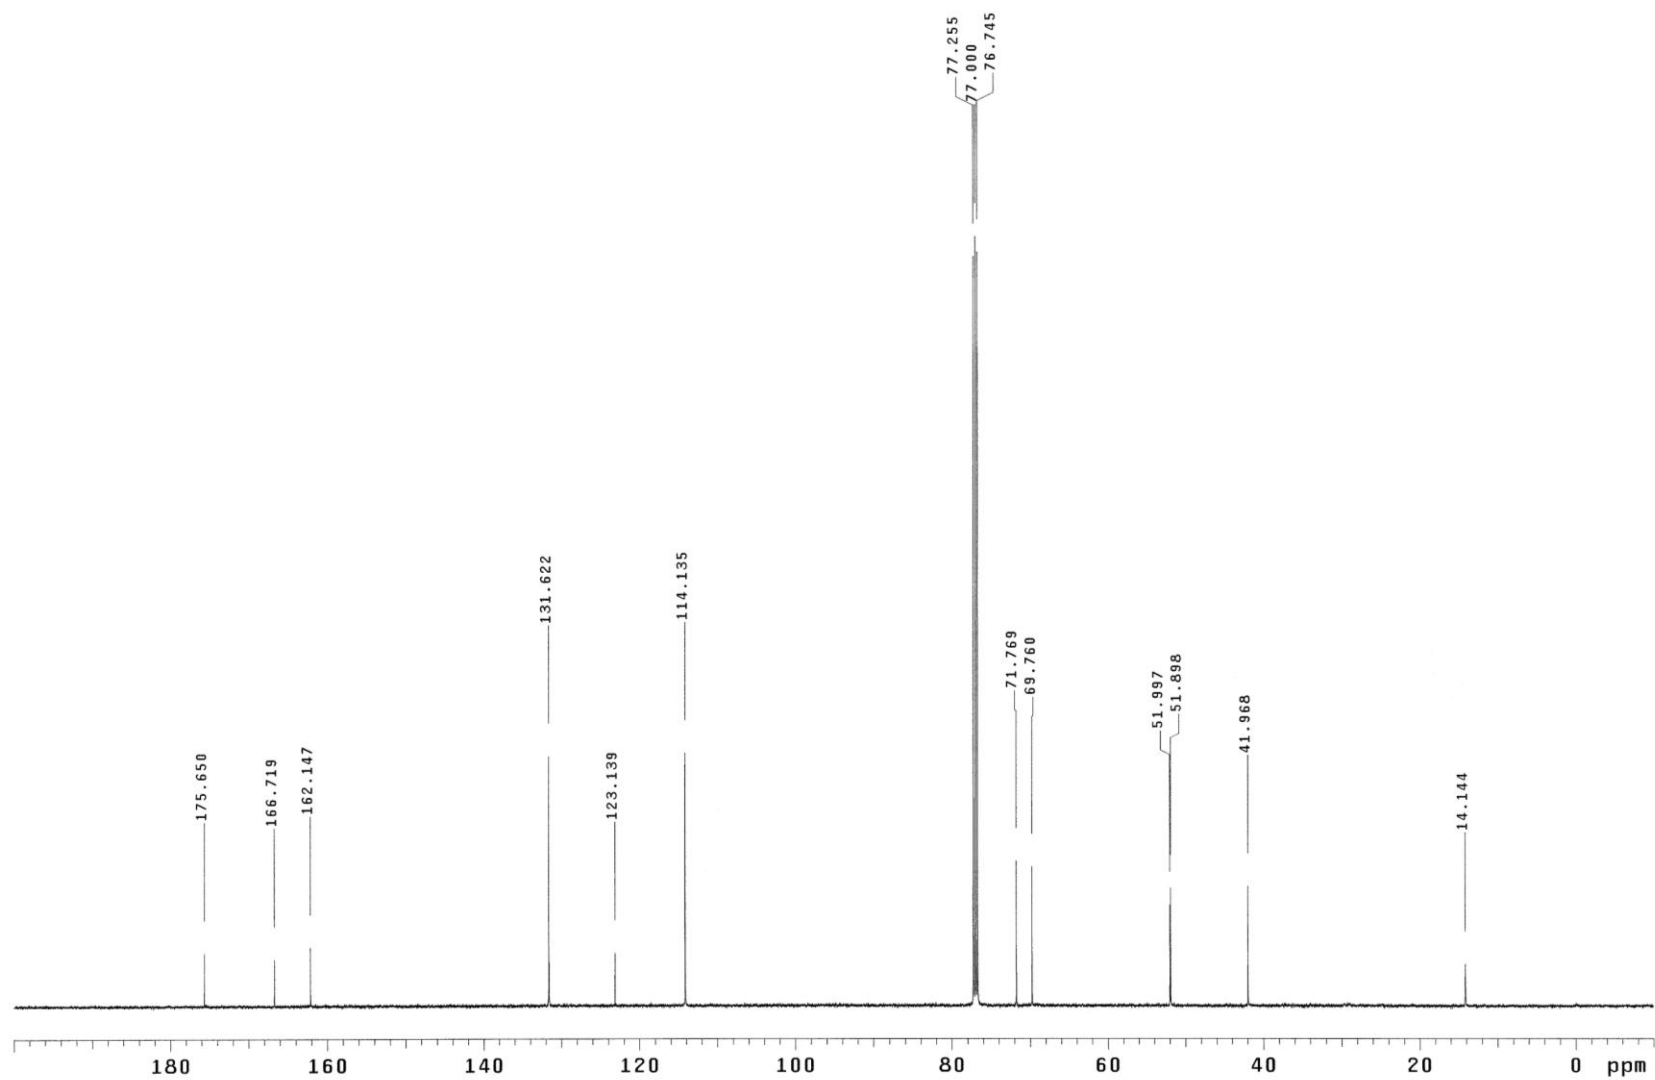

**Figure S9.** ESI-MS spectrum of **3**.

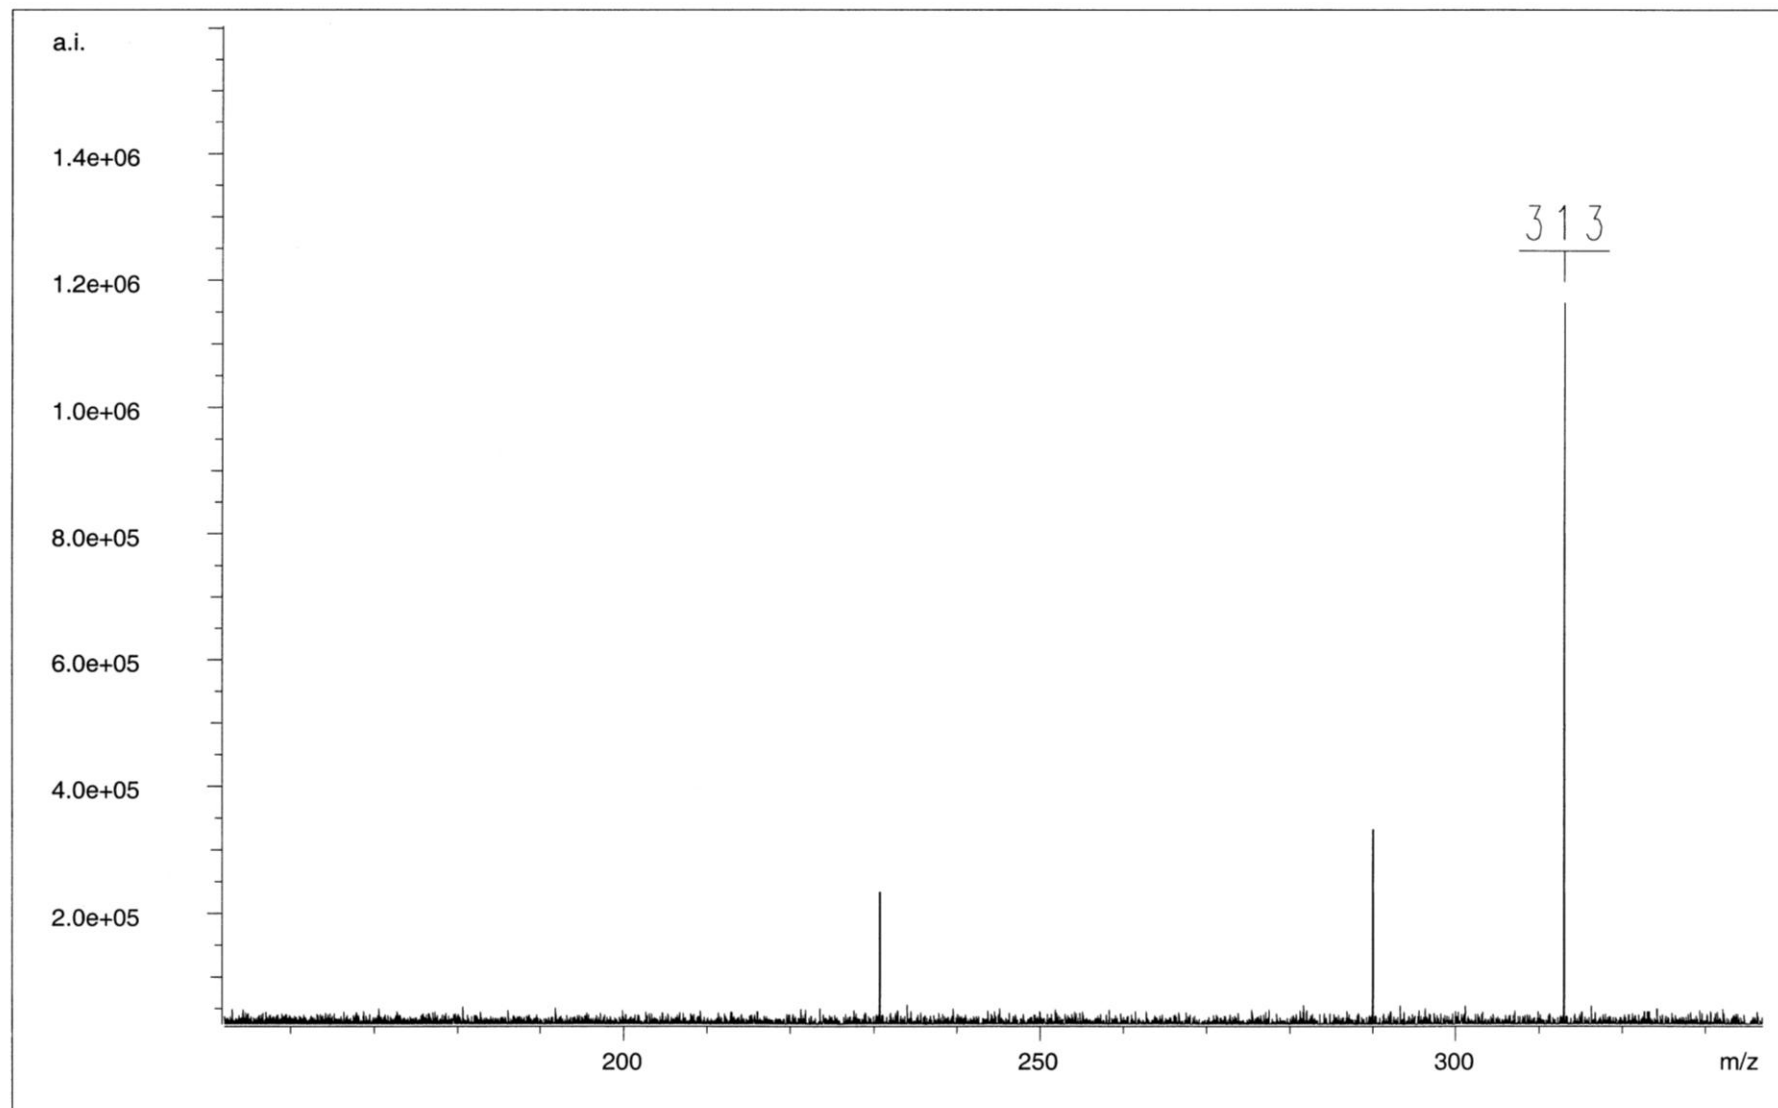

**Figure S10.** HR-ESI-MS spectrum of **3**.

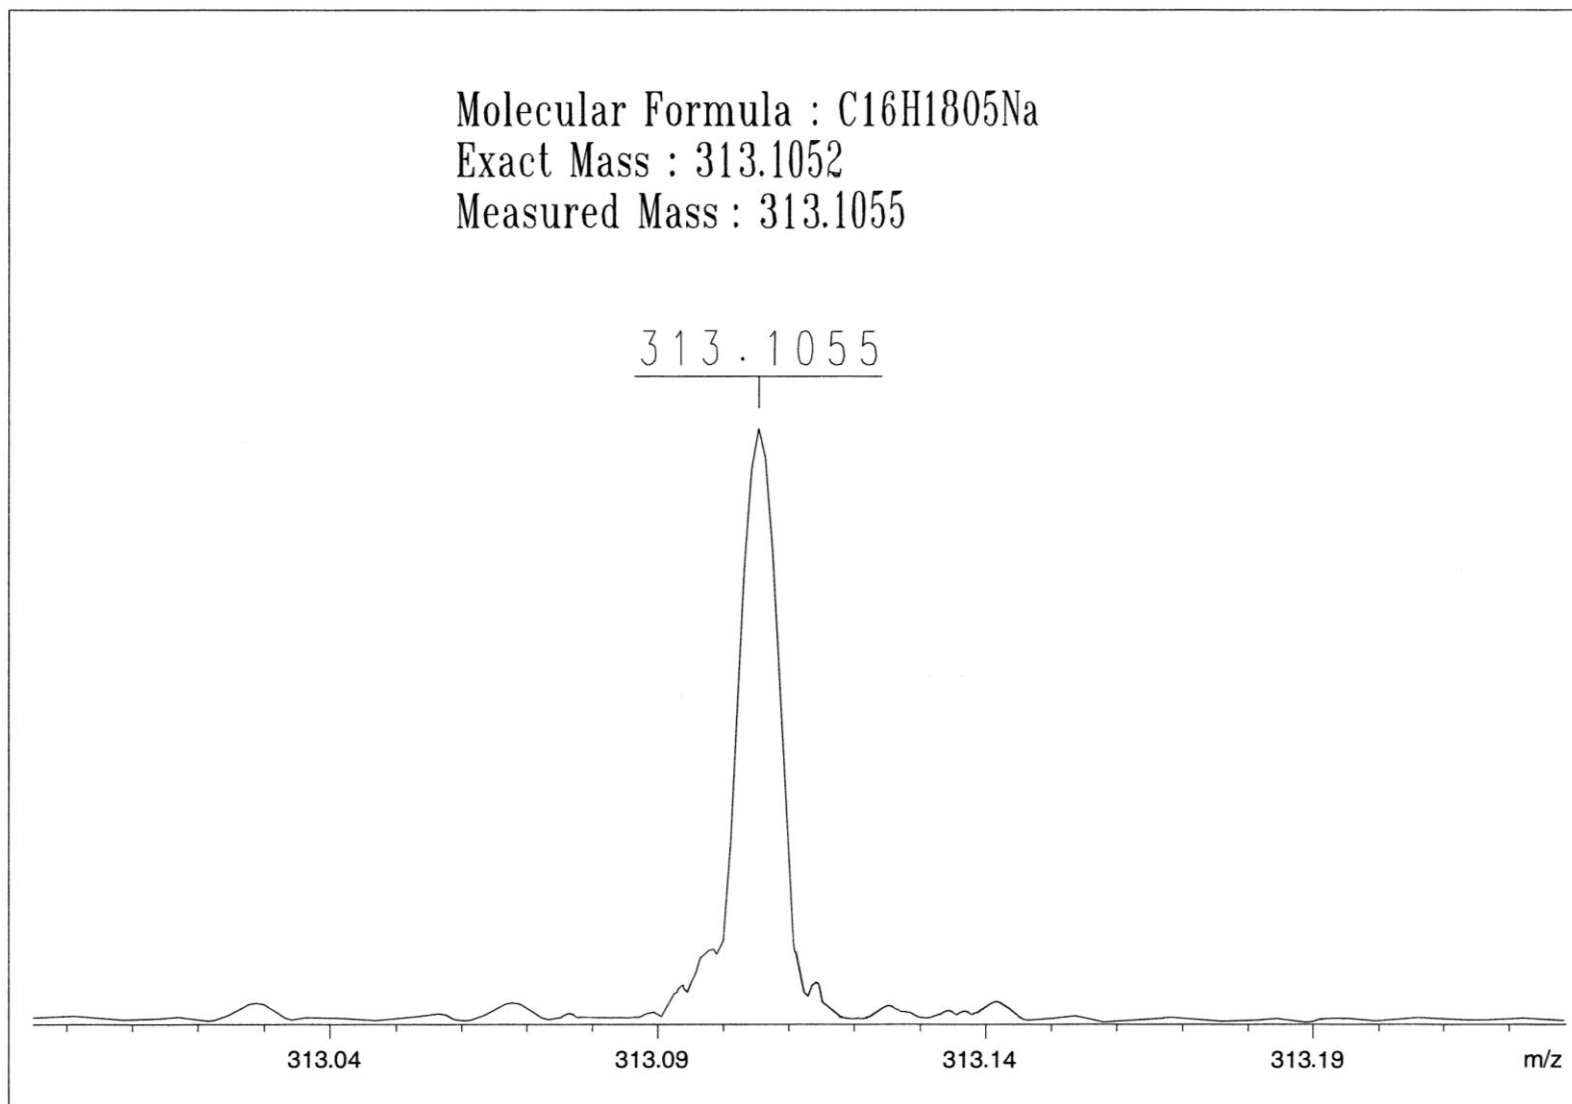

**Figure S11.**  $^1\text{H}$ -NMR spectrum ( $\text{CDCl}_3$ , 400 MHz) of **3**.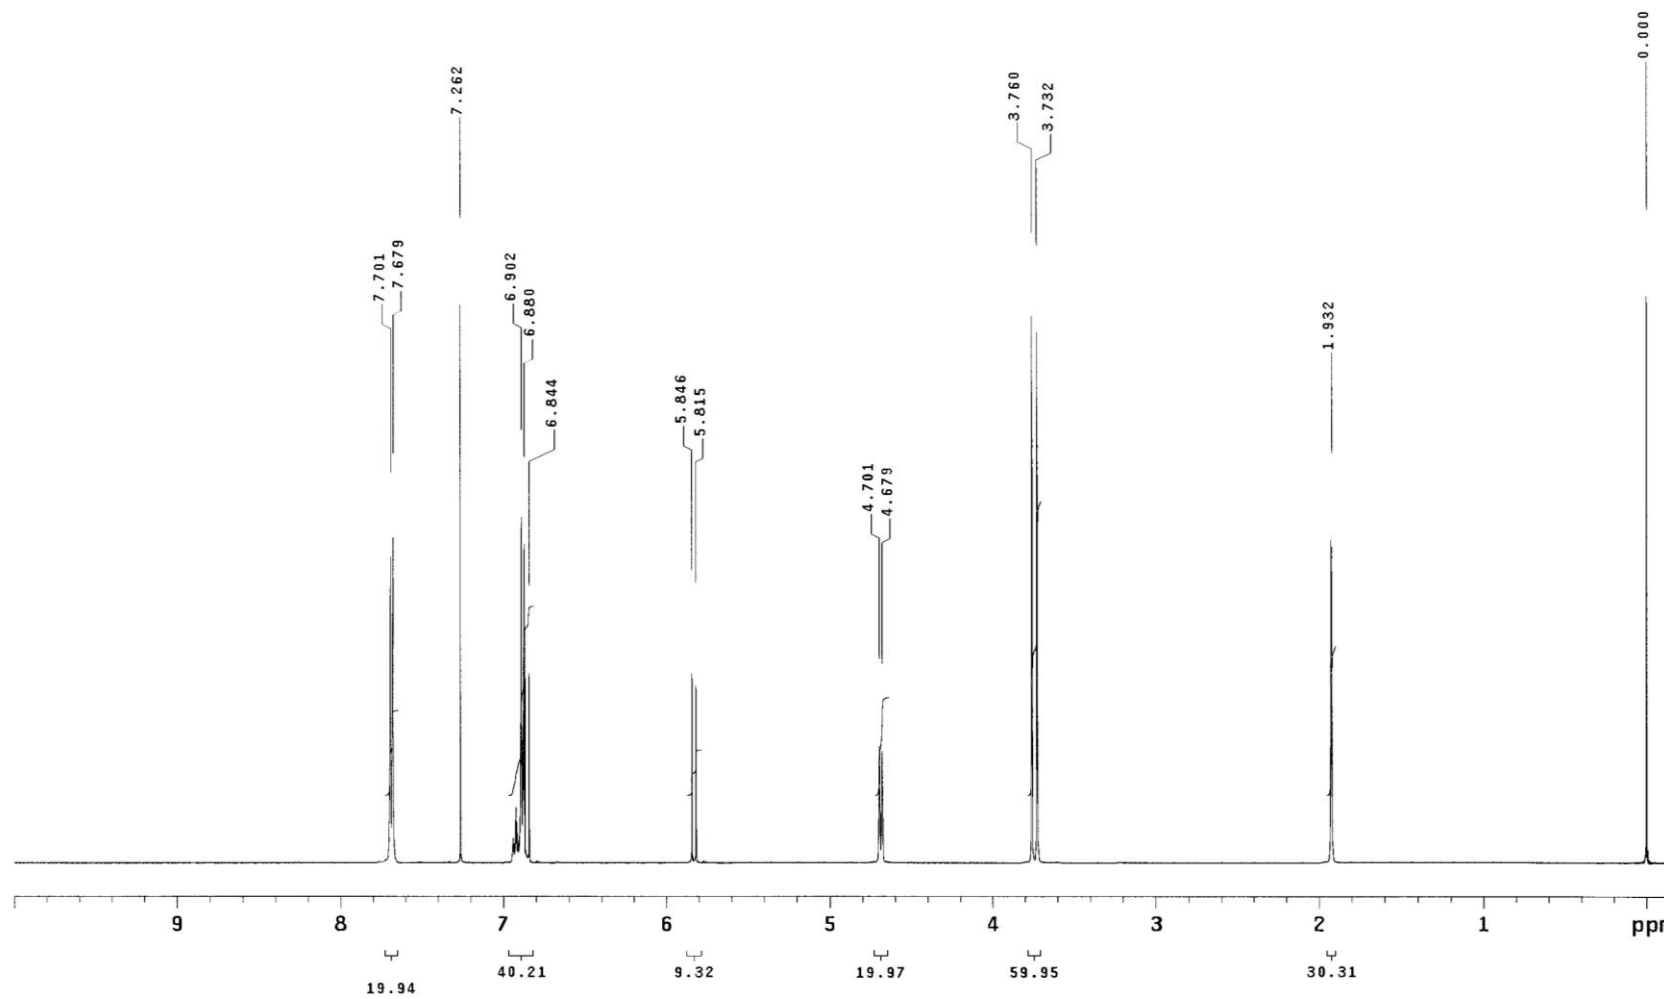

**Figure S12.**  $^{13}\text{C}$ -NMR spectrum of **3** ( $\text{CDCl}_3$ , 100 MHz).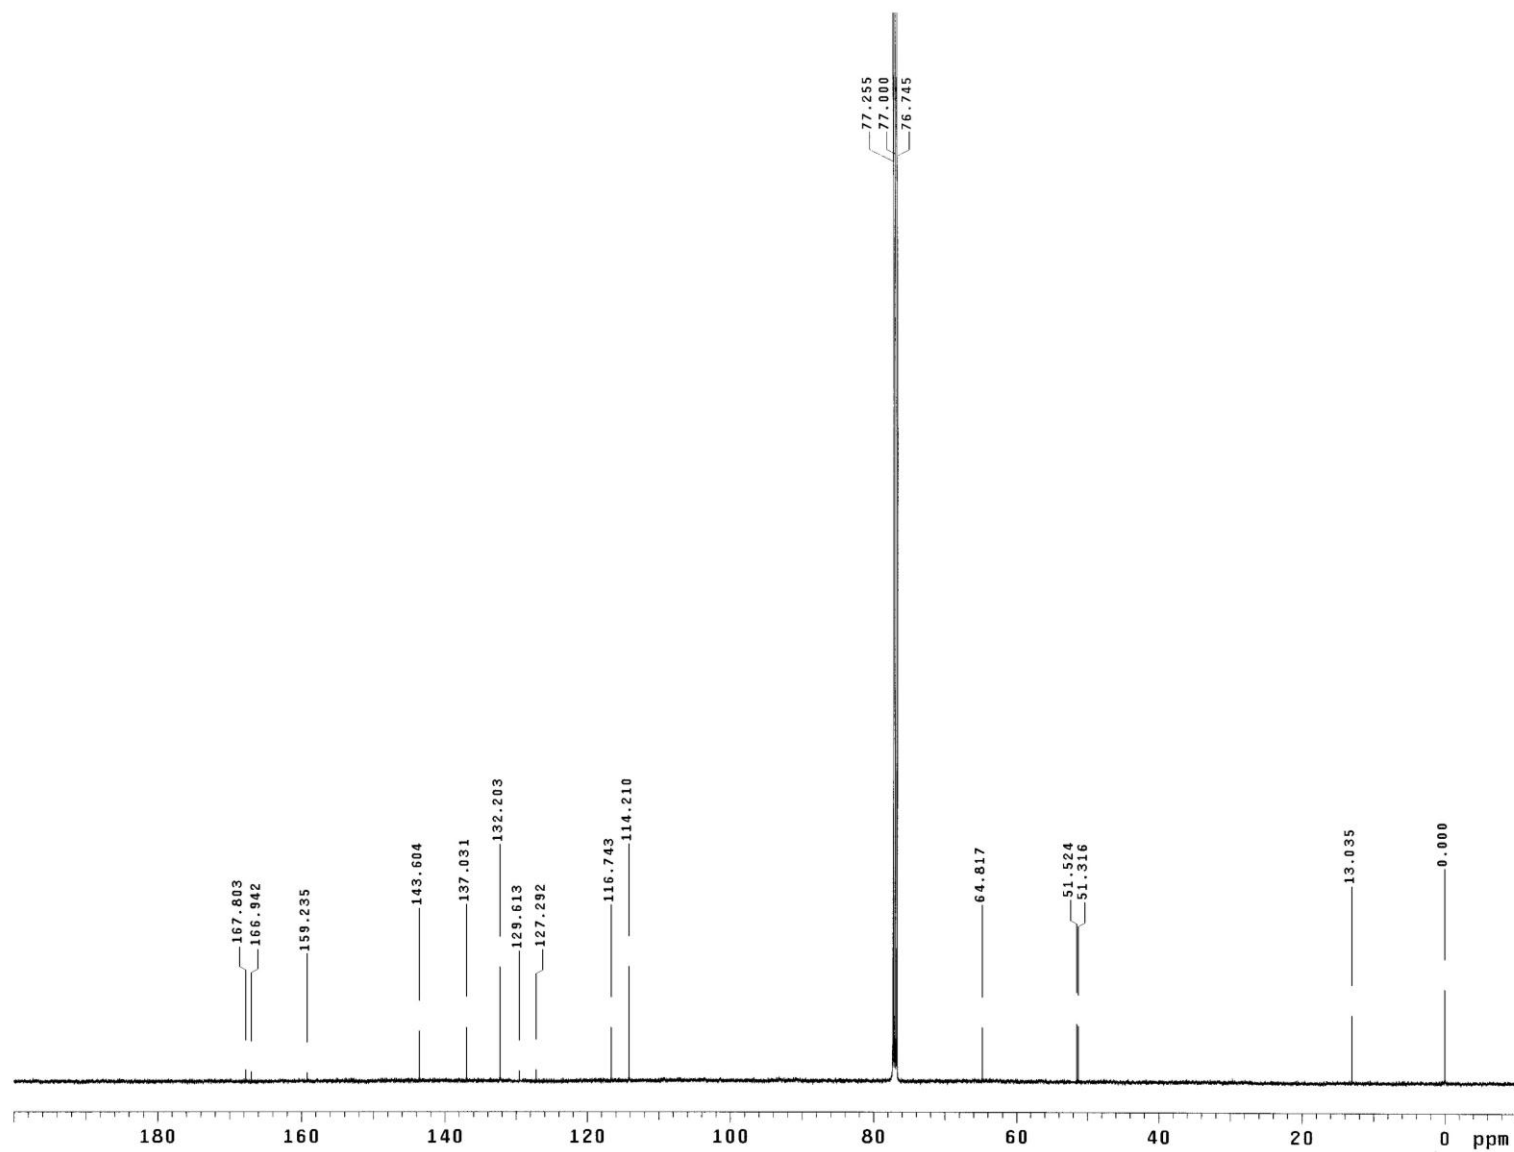

Supplement: Supplementary file 1 [file ijms-14-22395-s001.pdf]
